# Supplementary material
Source: publisher figshare collection journal article supplement (https://gsapubs.figshare.com/ndownloader/files/33946619)
Supplement: Supplementary file 1 [file 33946619]

## Sheet: Table S7 trace ICP
Table S7. Whole rock trace element geochemistry from ICPMS
Sample ID	La ppm	Ce ppm	Pr ppm	Nd ppm	Sm ppm	Eu ppm	Gd ppm	Tb ppm	Dy ppm	Ho ppm	Er ppm	Tm ppm	Yb ppm	Lu ppm	Ba ppm	Th ppm	Nb ppm	Y ppm	Hf ppm	Ta ppm	U ppm	Pb ppm	Rb ppm	Cs ppm	Sr ppm	Sc ppm	Zr ppm
12EGNS2A	75.8386	135.222	14.7082	49.6759	7.3436	1.8442	4.70921	0.628823	3.28849	0.588201	1.46084	0.201479	1.26338	0.210441	820.861	14.3823	11.6444	14.9478	6.70118	0.431707	1.43093	8.19678	54.1574	1.8263	1035.88	3.9703	273.91
12EGNS3A	17.5446	33.6695	3.9186	14.2744	2.78446	0.869316	2.07319	0.281513	1.42833	0.244108	0.633397	0.0910051	0.585927	0.0947654	1302.3	4.71037	5.20014	6.7983	2.759	0.502064	1.2702	33.1343	100.564	3.29836	696.947	2.40897	103.362
12EGNS3B	9.87511	19.66	2.33741	8.47086	2.23999	0.501665	2.0388	0.355609	2.08921	0.384427	0.965347	0.14385	0.865052	0.115848	714.924	4.64187	6.23804	11.0672	1.68222	0.9242	0.829024	45.5322	128.595	1.84048	279.983	1.4912	44.1602
12EGNS5	5.61426	11.4901	1.31693	4.38226	1.71272	0.089718	2.31204	0.538222	3.73768	0.789243	2.26711	0.347082	2.12388	0.309149	19.7692	5.72723	7.91848	24.8751	1.88049	1.49318	4.39664	74.3322	157.663	2.09837	38.74	0.427277	40.0667
12EGSS1	42.7347	76.0491	8.40687	28.9941	4.99788	1.23538	3.49837	0.46205	2.17366	0.339441	0.820214	0.106284	0.647974	0.0930499	1024.32	14.5468	8.26954	9.56615	3.83528	0.634756	1.72564	27.4693	118.574	2.63276	675.22	2.68199	137.069
13EGSS4	21.0713	41.2177	4.60431	16.0903	3.20126	0.688928	2.33344	0.323514	1.64245	0.274115	0.693048	0.0973905	0.610973	0.0869141	933.536	9.67794	6.8959	8.10521	2.83742	0.683437	1.84651	18.4598	263.961	3.37454	156.412	1.57853	86.8699
TUNG	24.0615	46.6336	5.46367	20.5541	4.55808	0.991273	3.81718	0.569069	3.06322	0.542027	1.36275	0.195692	1.14409	0.16839	809.67	8.36227	8.77269	15.2127	2.44745	0.700264	3.1887	20.4803	123.117	2.41273	342.431	2.94775	79.0318
13EGK6	25.8725	49.7251	5.81214	21.6702	4.57384	1.15813	3.45883	0.463094	2.16949	0.359049	0.825619	0.115162	0.705377	0.101071	1118.62	8.98044	6.63415	9.8346	2.25925	0.573966	1.16974	21.8317	106.379	1.48715	393.721	2.1924	73.2961

## Sheet: Info
This Supplemental Material accompanies Gottlieb, E.S., Miller, E.L., Valley, J.W.,
Fisher, C.M., Vervoort, J.D., and Kitajima, K., 2022, Zircon petrochronology of Cretaceous
Cordilleran interior granites of the Snake Range and Kern Mountains, Nevada, USA,
in Craddock, J.P., Malone, D.H., Foreman, B.Z., and Konstantinou, A., eds., Tectonic Evolution
of the Sevier-Laramide Hinterland, Thrust Belt, and Foreland, and Postorogenic Slab Rollback
(180–20 Ma): GSA Special Paper 555, https://doi.org/10.1130/2022.2555(02).
